# Supplementary material for: Enhanced immunocompatibility of ligand-targeted liposomes by attenuating natural IgM absorption
Source: PubMed Central journal article supplement (PMC6065320; doi:10.1038/s41467-018-05384-1), 2018-07-30
Supplement: 41467_2018_5384_MOESM1_ESM.pdf [file 41467_2018_5384_MOESM1_ESM.pdf]

**Supplementary Information**

**Enhanced Immunocompatibility of Ligand-targeted Liposomes by Attenuating Natural  
IgM Absorption**

Guan and Shen et al

## Supplementary Figures

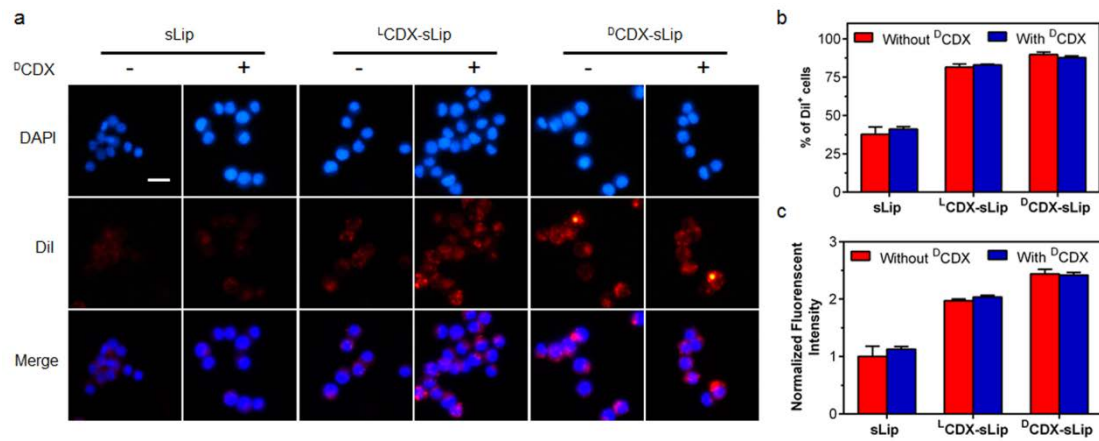

Supplementary Figure 1. The uptake of sLip, <sup>1</sup>CDX-sLip and <sup>D</sup>CDX-sLip by RAW264.7 cells. (a) Microscopic observation and (b, c) quantitative analysis of phagocytosis of sLip, <sup>1</sup>CDX-sLip and <sup>D</sup>CDX-sLip with or without 2 h pre-incubation with 200  $\mu$ M free <sup>D</sup>CDX peptide. Scale bar = 20  $\mu$ m. n = 3, Data are means  $\pm$  s.d.

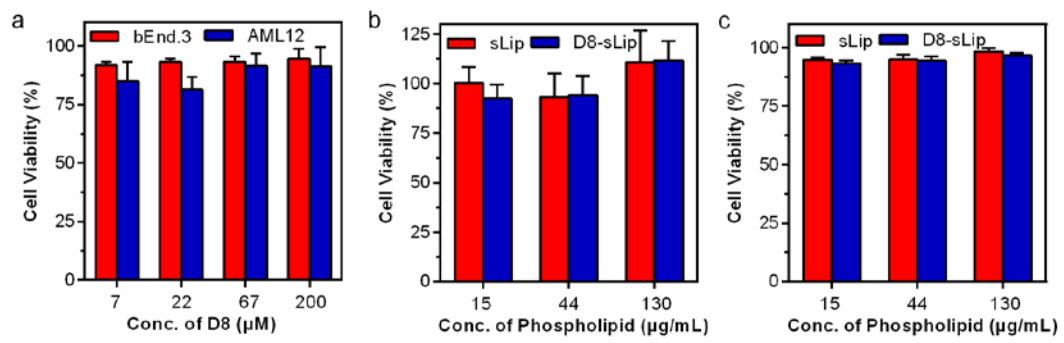

Supplementary Figure 2. Cytotoxicity of free D8 peptide and D8-sLip. (a) Cytotoxicity of free D8 peptide against bEnd.3 and AML12 cells. sLip and D8-sLip against (b) AML12 and (c) bEnd.3 cells after 48 h incubation at 37 °C. Data are means  $\pm$  s.d. (n = 3).

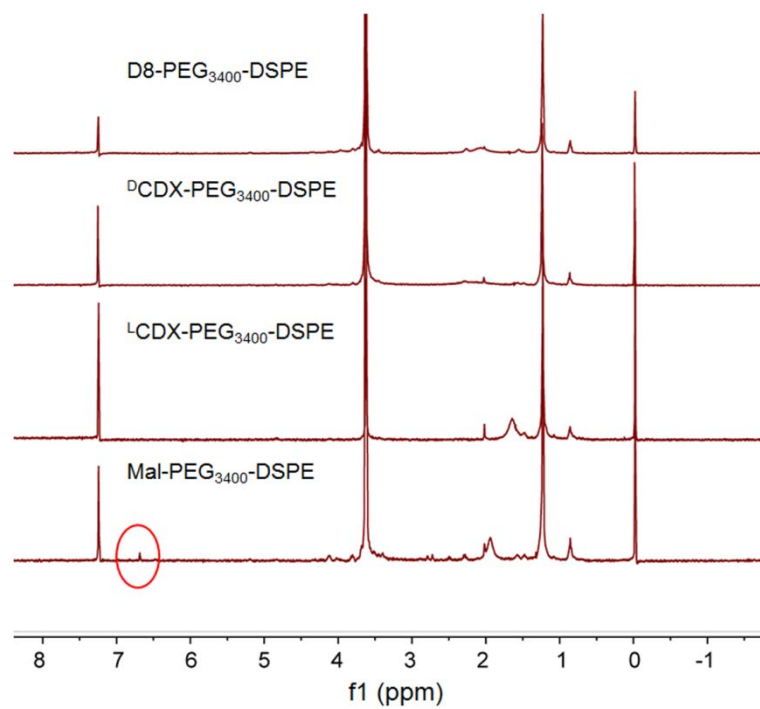

Supplementary Figure 3. <sup>1</sup>H-NMR spectra of mal-PEG<sub>3400</sub>-DSPE and peptide-PEG<sub>3400</sub>-DSPE. The characteristic peak of maleimide at 6.8 ppm was circled.

## Supplementary Tables

Supplementary Table 1. Area under the curve ( $AUC_{0-24}$ ) of liposomes (50 mg HSPC per kg of mouse) with or without pre-dose of blank liposomes (5 mg HSPC per kg of mouse, no DiI loading) in BALB/c mice. n=3, data are means  $\pm$  s.d.

|                       | $AUC_{0-24}$ ( $\mu\text{g}\cdot\text{h mL}^{-1}$ ) |                  |
|-----------------------|-----------------------------------------------------|------------------|
|                       | Without pre-dose                                    | With pre-dose    |
| sLip                  | 584.2 $\pm$ 6.8                                     | 350.3 $\pm$ 10.7 |
| <sup>L</sup> CDX-sLip | 164.8 $\pm$ 10.1                                    | 8.7 $\pm$ 4.7    |
| <sup>D</sup> CDX-sLip | 18.3 $\pm$ 2.4                                      | 7.3 $\pm$ 0.6    |
| D8-sLip               | 286.8 $\pm$ 21.5                                    | 112.7 $\pm$ 13.9 |

Supplementary Table 2. Characterization of sLip, <sup>L</sup>CDX-sLip and <sup>D</sup>CDX-sLip with or without pre-incubation with serum at 37°C for 1 h, n = 3, data are means ± s.d.

|                       | Without serum |            |             | With serum |            |             |
|-----------------------|---------------|------------|-------------|------------|------------|-------------|
|                       | Size (nm)     | PDI        | Zeta (mV)   | Size (nm)  | PDI        | Zeta (mV)   |
| sLip                  | 138.9±0.72    | 0.059±0.02 | -48.33±1.97 | 120.8±0.98 | 0.286±0.01 | -19.23±1.57 |
| <sup>L</sup> CDX-sLip | 138.8±0.14    | 0.086±0.02 | -30.87±0.95 | 123.4±2.82 | 0.246±0.02 | -14.63±1.28 |
| <sup>D</sup> CDX-sLip | 136.4±2.48    | 0.057±0.01 | -31.45±0.46 | 118.8±1.56 | 0.301±0.02 | -15.46±2.02 |

Supplementary Table 3. Peptide sequences.

| Peptide             | Sequence                                                                                                                                                                                                             | Length (AA) |
|---------------------|----------------------------------------------------------------------------------------------------------------------------------------------------------------------------------------------------------------------|-------------|
| <sup>L</sup> CDX    | FKESWREARGTRIERG                                                                                                                                                                                                     | 16          |
| <sup>D</sup> CDX    | G <sup>D</sup> R <sup>D</sup> E <sup>D</sup> I <sup>D</sup> R <sup>D</sup> TG <sup>D</sup> R <sup>D</sup> A <sup>D</sup> E <sup>D</sup> R <sup>D</sup> W <sup>D</sup> S <sup>D</sup> E <sup>D</sup> K <sup>D</sup> F | 16          |
| <sup>D</sup> CDX-1  | G <sup>D</sup> R <sup>D</sup> A <sup>D</sup> I <sup>D</sup> R <sup>D</sup> TG <sup>D</sup> R <sup>D</sup> A <sup>D</sup> E <sup>D</sup> R <sup>D</sup> W <sup>D</sup> S <sup>D</sup> A <sup>D</sup> K <sup>D</sup> F | 16          |
| <sup>D</sup> CDX-2  | G <sup>D</sup> A <sup>D</sup> E <sup>D</sup> I <sup>D</sup> R <sup>D</sup> TG <sup>D</sup> R <sup>D</sup> A <sup>D</sup> E <sup>D</sup> R <sup>D</sup> W <sup>D</sup> S <sup>D</sup> E <sup>D</sup> A <sup>D</sup> F | 16          |
| <sup>D</sup> CDX-S8 | <sup>D</sup> R <sup>D</sup> TG <sup>D</sup> R <sup>D</sup> A <sup>D</sup> E <sup>D</sup> R <sup>D</sup> W                                                                                                            | 8           |
| ANG                 | TFYGGSRGKRNNFKTEEY                                                                                                                                                                                                   | 19          |
| D8                  | <sup>D</sup> RTG <sup>D</sup> R <sup>D</sup> A <sup>D</sup> RE <sup>D</sup> W                                                                                                                                        | 8           |

Supplementary Table 4. Characterization of different liposomes shown in the table with or without pre-incubation of serum at 37°C for 1 h. Size and zeta potential were all measured by Malvern laser particle size analyzer. n = 3, data are means  $\pm$  s.d.

| Liposomes                | Without serum    |                  |                     | With serum       |                  |                     |
|--------------------------|------------------|------------------|---------------------|------------------|------------------|---------------------|
|                          | Size (nm)        | PDI              | Zeta-potential (mV) | Size (nm)        | PDI              | Zeta-potential (mV) |
| D8-sLip                  | 135.7 $\pm$ 1.79 | 0.017 $\pm$ 0.02 | -38.5 $\pm$ 1.73    | 128.6 $\pm$ 1.28 | 0.302 $\pm$ 0.01 | -17.2 $\pm$ 1.02    |
| DOTAP-sLip               | 157.8 $\pm$ 0.57 | 0.104 $\pm$ 0.02 | 59.5 $\pm$ 0.95     | 122.5 $\pm$ 0.56 | 0.247 $\pm$ 0.02 | -16.9 $\pm$ 0.86    |
| <sup>D</sup> CDX-1-sLip  | 141.6 $\pm$ 0.46 | 0.116 $\pm$ 0.04 | 17.5 $\pm$ 2.96     | 125.8 $\pm$ 0.58 | 0.267 $\pm$ 0.01 | -20.4 $\pm$ 1.31    |
| <sup>D</sup> CDX-2-sLip  | 136.9 $\pm$ 1.34 | 0.163 $\pm$ 0.02 | -38.9 $\pm$ 0.89    | 99.74 $\pm$ 0.86 | 0.222 $\pm$ 0.03 | -19.4 $\pm$ 0.97    |
| Angiopep-2-sLip          | 128.1 $\pm$ 1.90 | 0.091 $\pm$ 0.02 | -32.6 $\pm$ 1.69    | 246.9 $\pm$ 1.97 | 0.683 $\pm$ 0.02 | -17.1 $\pm$ 0.58    |
| <sup>D</sup> CDX-S8-sLip | 136.5 $\pm$ 2.19 | 0.064 $\pm$ 0.01 | -37.9 $\pm$ 0.20    | 124.6 $\pm$ 1.86 | 0.158 $\pm$ 0.03 | -16.1 $\pm$ 0.75    |



Supplementary Table 5. Predicted free energies of binding of the peptides with  $\alpha 7$  nAChR

| Peptide sequence                                                                                                                                                                                                     | Predicted $\Delta G$ [kcal mol <sup>-1</sup> ] |
|----------------------------------------------------------------------------------------------------------------------------------------------------------------------------------------------------------------------|------------------------------------------------|
| G <sup>D</sup> R <sup>D</sup> E <sup>D</sup> I <sup>D</sup> R <sup>D</sup> TG <sup>D</sup> R <sup>D</sup> A <sup>D</sup> E <sup>D</sup> R <sup>D</sup> W <sup>D</sup> S <sup>D</sup> E <sup>D</sup> K <sup>D</sup> F | -10.11                                         |
| <sup>D</sup> R <sup>D</sup> TG <sup>D</sup> R <sup>D</sup> A <sup>D</sup> E <sup>D</sup> R <sup>D</sup> W                                                                                                            | -10.47                                         |
| <sup>D</sup> R <sup>D</sup> TG <sup>D</sup> R <sup>D</sup> A <sup>D</sup> RE <sup>D</sup> W                                                                                                                          | -11.06                                         |
| <sup>D</sup> RTG <sup>D</sup> R <sup>D</sup> A <sup>D</sup> RE <sup>D</sup> W                                                                                                                                        | -11.48                                         |
